# Supplementary material
Source: PubMed Central journal article supplement (PMC4743435)
Supplement: biometrika2011sup.pdf [file biometrika2011sup.pdf]

# Web-based Supplementary Material for “Functional Mixed Effects Spectral Analysis”

BY ROBERT T. KRAFTY

*Department of Statistics, University of Pittsburgh, Pittsburgh, Pennsylvania, U.S.A. 15260*

krafty@pitt.edu

MARTICA HALL

*Department of Psychiatry, University of Pittsburgh, Pittsburgh, Pennsylvania, U.S.A. 15213*

hallmh@upmc.edu

AND WENSHENG GUO

*Division of Biostatistics, University of Pennsylvania, Philadelphia, Pennsylvania, U.S.A. 19104*

wguo@mail.med.upenn.edu

## 1. PROOF OF THEOREM 1

Let  $a_{jkm} = \int_{-1/2}^{1/2} A_0(\omega; U_{jk}) A_j(\omega; V_{jk}) e^{-2\pi i \omega m} d\omega$  so that  $X_{jkt}$  has the form  $X_{jkt} = \sum_m a_{jkm} z_{jkt-m}$ ,  $d_{jkl}^z = T^{-1/2} \sum_{t=1}^T z_{jkt} e^{-2\pi i \omega_\ell t}$  be the discrete Fourier transform of the unobserved white noise  $z_{jkt}$ , and  $I_{jkl}^z = |d_{jkl}^z|^2$  be the corresponding periodogram. It is well known, i.e. Theorem 5.2.6 in Brillinger (2002), that under the conditions of Theorem 1, as  $T \rightarrow \infty$ ,  $I_{jkl}^z$  are asymptotically distributed as  $\chi_{df}^2/df$  random variables with  $df=2$  if  $\omega_\ell \neq 0, 1/2$  and  $df=1$  if  $\omega_\ell = 0, 1/2$ . There have been several approaches to the study of non-linear functions/functionals of the periodograms of white noise for use in a variety of applications. The

following Lemma is taken as an immediate consequence of the Edgeworth expansion of Götze & Hipp (1983). Further details about the application of this expansion to periodograms can be found in Lemma A.1 of von Sachs (1994) and a discussion about its applicability under the unbounded log transformation when the absolute continuity of the distribution of  $I_{jkt}^z$  is assured by (RA2) can be found in Janas & von Sachs (1995).

LEMMA 1. *If (RA1)-(RA3) hold, then uniformly in  $j, k, \ell, \ell'$*

- (i)  $E\left(\log I_{jkl}^z\right) = -\gamma_\ell + O(T^{-1})$
- (ii)  $\text{var}(\log I_{jkl}^z) = \sigma_\ell^2 + O(T^{-1})$
- (iii)  $\text{cov}\left(\log I_{jkl}^z, \log I_{jk\ell'}^z\right) = O(T^{-1})$  when  $|\ell| \neq |\ell'|$ .

Theorem 1 will follow from Lemma 1 after finding the decay of the remainder of the Bartlett's decomposition

$$\sup_{j,k,\ell} E\left\{|\log I_{jkl} - \log f_{jk}(\omega_\ell; U_{jk}, V_{jk}) - \log I_{jkl}^z|^2\right\} = O(T^{-1}).$$

To show this decay, a first order Taylor's series expansion of  $\log I_{jkl}$  around  $\log f_{jk}(\omega_\ell; U_{jk}, V_{jk})$  can be taken where there exist  $\eta_{jkl} \in [0, 1]$  such that

$$\log I_{jkl} - \log f_{jk}(\omega_\ell; U_{jk}, V_{jk}) - \log I_{jkl}^z = \frac{R_{jkl}}{f_{jk}(\omega_\ell; U_{jk}, V_{jk})I_{jkl}^z + \eta_{jkl}R_{jkl}}$$

for  $R_{jkl} = I_{jkl} - f_{jk}(\omega_\ell; U_{jk}, V_{jk})I_{jkl}^z$ . The proof of Theorem 1 can then be completed by applying Lemmas 2 and 3 which respectively find that  $|R_{jkl}| = O_p(T^{-1/2})$  and  $|f_{jk}(\omega_\ell; U_{jk}, V_{jk})I_{jkl}^z + \eta_{jkl}R_{jkl}|^{-2} = O_p(1)$ .

LEMMA 2. *Under the assumptions of Theorem 1,  $\sup_{j,k,\ell} E|R_{jkl}|^2 = O(T^{-1})$  as  $T \rightarrow \infty$ .*

*Proof.* Let  $Q_{jklm} = \sum_{t=1-m}^{T-m} z_{jkt} e^{-2\pi i \omega_\ell t} - \sum_{t=1}^T z_{jkt} e^{-2\pi i \omega_\ell t}$  so that  $d_{jkl} = A_0(\omega_\ell; U_{jk})A_j(\omega_\ell; V_{jk})d_{jkl}^z + r_{jkl}$  where  $r_{jkl} = T^{-1/2} \sum_m a_{jkm} e^{-2\pi i m \omega_\ell} Q_{jklm}$ . It then

follows from Cauchy–Schwarz

$$E(|R_{jkl}|^2) \leq 2 [E\{f_j^2(\omega_\ell; U_{jk}, V_{jk})\}]^{1/2} [E\{(I_{jkl}^z)^2\}]^{1/2} \{E(|r_{jkl}|^4)\}^{1/2} + 2E(|r_{jkl}|^4).$$

Since the fourth cumulant of  $Z_{jk}$  being bounded implies that  $E(I_{jkl}^z)^2$  is uniformly bounded and the finite fourth moments of the transfer functions in conjunction with their continuity and (RA5) implies  $E\{f_j^2(\omega_\ell; U_{jk}, V_{jk})\}$  is uniformly bounded, the lemma is completed once the decay of  $r_{jkl}$  is found.

Define the random functions

$$\begin{aligned} \mathcal{A}_{jk}(\omega) &= \int_\nu \int_\zeta \int_\xi A_0(\omega - \nu - \zeta; U_{jk}) A_j(\omega - \nu - \zeta; V_{jk}) A_0(\xi; V_{jk}) A_j(\xi; V_{jk}) \\ &\quad \times \overline{A_0(\zeta - \xi; U_{jk}) A_j(\zeta - \xi; V_{jk}) A_0(\zeta; U_{jk}) A_j(\zeta; V_{jk})} d\nu d\zeta d\xi \end{aligned}$$

so that  $E\{\mathcal{A}_{jk}(\omega)\}$  has the Fourier coefficients  $E(|a_{jkm}|^4)$  by Theorem 1.12 in Zygmund (2003). From the smoothness of  $h_p^0$ ,  $h_q$  and (RA5), the second derivative of  $E(\mathcal{A}_{jk})$  is uniformly absolutely continuous and subsequently there exists a constant  $C_0$  such that  $E(|a_{jkm}|^4) \leq C_0|m|^{-2}$  for all  $j, k, m$ . Note that, by Theorem 10.3.1 in Brockwell & Davis (2006),  $E|Q_{jklm}|^4 \leq 6|m|^2 + 2[\sup_\omega E\{|Z_{jk}(\omega)|^4\}]|m|$ . Consequently,

$$E(|r_{jkl}|^4) \leq \left[ T^{-1/2} \sum_m \{E(|a_{jkm}|^4)\}^{1/4} \{E(|Q_{jklm}|^4)\}^{1/4} \right]^4 = O(T^{-2}) \text{ uniformly in } j, k, \ell$$

LEMMA 3. Under the assumptions of Theorem 1,  $\sup_{j,k,\ell} E\{|f_{jk}(\omega_\ell; U_{jk}, V_{jk})I_{jkl}^z + \eta_{jkl}R_{jkl}|^{-2}\} = O(1)$ .

*Proof.* By Schwarz's inequality and the definition of  $R_{jkl}$ ,  $E\left\{\left|I_{jkl}/I_{jkl}^z - f_{jk}(\omega_\ell; U_{jk}, V_{jk})\right|^2\right\} \leq E(|R_{jkl}|^2) E(|I_{jkl}^z|^{-2})$ . Lemma 2 found that  $\sup_{j,k,\ell} E(|R_{jkl}|^2) = o(1)$  and Lemma 5 in Fay et al. (2002) shows that  $\sup_{j,k,\ell} E(|I_{jkl}^z|^{-2}) = O(1)$  under (RA1)-(RA3). Consequently,  $|I_{jkl}/I_{jkl}^z - f_{jk}(\omega_\ell; U_{jk}, V_{jk})| = o_p(1)$  and it suffices

to prove Lemma 3 over the event

$$\Omega = \left\{ \sup_{j,k,\ell} |I_{jkl}/I_{jkl}^z - f_{jk}(\omega_\ell; U_{jk}, V_{jk})| < \epsilon \right\}$$

where  $\epsilon$  is defined in (RA4). Under  $\Omega$ ,  $I_{jkl} \geq \{f_{jk}(\omega_\ell; U_{jk}, V_{jk}) - \epsilon\} I_{jkl}^z$  and

$$f_{jk}(\omega_\ell; U_{jk}, V_{jk}) I_{jkl}^z + \eta_{jkl} R_{jkl} \geq \{f_{jk}(\omega_\ell; U_{jk}, V_{jk}) - \epsilon\} I_{jkl}^z$$

so that  $\sup_{j,k,\ell} E \left\{ \left| f_{jk}(\omega_\ell; U_{jk}, V_{jk}) I_{jkl}^z + \eta_{jkl} R_{jkl} \right|^{-2} \mid \Omega \right\} = O(1)$ .  $\square$

## 2. PROOF OF THEOREM 2

Let  $\|\cdot\|_\infty$  be the norm over  $\mathbb{R}^P$  such that  $\|x\|_\infty = \sup x_j$  where  $x = (x_1, \dots, x_P)^T$ , define the induced operator norm on the space of  $P \times P$  matrices where  $\|M\|_\star = \sup_x \|Mx\|_\infty / \|x\|_\infty$ , and let  $\tilde{\Lambda} = \lambda^{-1}\Lambda$  and  $\tilde{\Theta} = \theta^{-1}\Theta$ . The proof will make use of the fact that, since  $\beta \in \otimes^P W_{2,\text{per}}^m$ ,  $\beta(\omega) = \sum_{m=-\infty}^{\infty} b_m \exp(2\pi i \omega m)$  where the Fourier coefficients satisfy  $\|b_m\|_\infty = O(|m|^{-2})$  (Zygmund, 2003). The proof will also use that, since  $\Gamma_q$  is the covariance of a stochastic process with realizations almost surely in  $W_{2,\text{per}}^2$ ,  $\Gamma_q \in W_{2,\text{per}}^2 \otimes W_{2,\text{per}}^2$  so that  $\Gamma_q(\omega, \nu) = \sum_{m=-\infty}^{\infty} \sum_{s=-\infty}^{\infty} g_{qms} e^{2\pi i m \omega + 2\pi i s \nu}$  where  $|g_{qms}| = O(|m|^{-2}|s|^{-2})$ .

Decomposing the mean square error  $E \left\{ \left| \hat{\beta}_p(\omega) - \beta_p(\omega) \right|^2 \right\} = \left| E \left\{ \hat{\beta}_p(\omega) \right\} - \beta_p(\omega) \right|^2 + \text{var} \left\{ \hat{\beta}_p(\omega) \right\}$ , we will consider the bias and variance terms separately. By the Woodbury Formula

$$\left\{ U^T U + \lambda n (2\pi m)^4 \tilde{\Lambda} \right\}^{-1} = (U^T U)^{-1} + \lambda (2\pi m)^4 \left\{ n^{-1} U^T U + \lambda (2\pi m)^4 \tilde{\Lambda} \right\}^{-1} \tilde{\Lambda} (U^T U)^{-1} \quad (1)$$

so that  $\sup_p |E \left\{ \hat{\beta}_p(\omega) \right\} - \beta_p(\omega)| \leq \|B_1(\omega)\|_\infty + \|B_2(\omega)\|_\infty + O(T^{-1})$  where

$$B_1(\omega) = T^{-1} \sum_{\ell=1-L}^L \sum_{m=1-L}^L \beta(\omega_\ell) e^{2\pi i m(\omega - \omega_\ell)} - \beta(\omega)$$

$$B_2(\omega) = T^{-1} \sum_{\ell=1-L}^L \sum_{m=1-L}^L \lambda (2\pi m)^4 \left\{ n^{-1} \tilde{\Lambda}^{-1} U^T U + \lambda (2\pi m)^4 \right\}^{-1} \beta(\omega_\ell) e^{2\pi i m(\omega - \omega_\ell)}$$

and the  $O(T^{-1})$  term is the error in the approximation of the mean of  $Y_\ell$  with  $U\beta(\omega_\ell)$  obtained in Theorem 1. Approximating averaging with integration and using the decay of the Fourier coefficients of  $\beta$  we find that

$$\begin{aligned} \sup_{\omega} \|B_1(\omega)\|_{\infty} &= \sup_{\omega} \left\| \sum_{m=1-L}^L \int \beta(\nu) e^{2\pi i m(\omega-\nu)} d\nu - \beta(\omega) \right\|_{\infty} + O(T^{-1}) \\ &\leq \sum_{|m|>L} \|b_m\|_{\infty} + O(T^{-1}) \\ &= O(T^{-1}) \end{aligned}$$

$$\begin{aligned} \sup_{\omega} \|B_2(\omega)\|_{\infty} &= \sup_{\omega} \left\| \sum_{m=1-L}^L \lambda(2\pi m)^4 \left\{ n^{-1} \tilde{\Lambda}^{-1} U^T U + \lambda(2\pi m)^4 \right\}^{-1} b_m e^{2\pi i m \omega} \right\|_{\infty} + O(T^{-1}) \\ &\leq \sum_{m=-\infty}^{\infty} \frac{\lambda(2\pi m)^4}{D_1 + \lambda C(2\pi m)^4} \|b_m\|_{\infty} + O(T^{-1}) \end{aligned}$$

where  $D_1$  is defined in (RA6). By Schwarz's inequality,  $2D_1^{1/2} C^{1/2} \lambda^{1/2} (2\pi m)^2 \leq D_1 + \lambda C(2\pi m)^4$ , so that

$$\begin{aligned} \sup_{\omega} \|B_2(\omega)\|_{\infty} &\leq \lambda^{1/2} 2\pi^2 D_1^{-1/2} C^{-1/2} \sum_{m=-\infty}^{\infty} |m|^2 \|b_m\|_{\infty} + O(T^{-1}) \\ &= O(\lambda^{1/2}) + O(T^{-1}) \end{aligned}$$

and it then follows that  $\sup_{p,\omega} \left| E \left\{ \hat{\beta}_p(\omega) \right\} - \beta_p(\omega) \right|^2 = O(\lambda) + O(T^{-1})$ .

To compute the variance term, note that  $\sup_p \text{var} \left\{ \hat{\beta}_p(\omega) \right\} \leq \|V_{\epsilon}(\omega)\|_{\star} + \|V_{\alpha}(\omega)\|_{\star} + O(T^{-1})$  where

$$\begin{aligned} V_{\epsilon}(\omega) &= \frac{1}{nT^2} \sum_{\ell,r=1-L}^L \sigma_{\ell}^2 \delta_{|\ell||r|} \sum_{m,s=1-L}^L \left\{ n^{-1} U^T U + \lambda(2\pi m)^4 \tilde{\Lambda} \right\}^{-1} (n^{-1} U^T U) \\ &\quad \times \left\{ n^{-1} U^T U + \lambda(2\pi s)^4 \tilde{\Lambda} \right\}^{-1} e^{2\pi i(m+s)\omega} e^{-2\pi i(m\omega_{\ell} + s\omega_r)} \\ V_{\alpha}(\omega) &= \frac{1}{nT^2} \sum_{\ell,r=1-L}^L \sum_{m,s=1-L}^L \left\{ n^{-1} U^T U + \lambda(2\pi m)^4 \tilde{\Lambda} \right\}^{-1} \left\{ n^{-1} \sum_{j=1}^N U_j^T V_j \Gamma(\omega_{\ell}, \omega_r) V_j^T U_j \right\} \\ &\quad \times \left\{ n^{-1} U^T U + \lambda(2\pi s)^4 \tilde{\Lambda} \right\}^{-1} e^{2\pi i m(\omega - \omega_{\ell}) + 2\pi i s(\omega - \omega_r)}. \end{aligned}$$

To find the decay of  $V_\epsilon$ , let  $S_{ms} = \sigma_0^2 + \sigma_{1/2}^2 e^{\pi i(m+s)} + \sum_{|\ell|=1}^{L-1} \sigma_\ell^2 e^{2\pi i m \omega_\ell}$  and note that  $|S_{ms}| \leq \sigma_0^2 T$  so that an application of Cauchy–Schwarz leads to

$$\begin{aligned} \|V_\epsilon(\omega)\|_\star &\leq \frac{1}{nT^2} \sup_{m,s} |S_{m,s}| \|n^{-1}U^T U\|_\star \sum_{m=1-L}^L \left\| \left\{ n^{-1}U^T U + \lambda(2\pi m)^4 \tilde{\Lambda} \right\}^{-1} \right\|_\star^2 \\ &\leq \frac{\sigma_0^2 D_2}{nT} \sum_{m=-\infty}^{\infty} \{D_1 + \lambda C(2\pi m)^4\}^{-2}. \end{aligned}$$

Since  $2 \sum_{m=-\infty}^{\infty} \{D_1 + \lambda C(2\pi m)^4\}^{-2} \leq C^{-1/4} \pi^{-1} \lambda^{-1/4} \int_{-\infty}^{\infty} (D_1 + \nu^4)^{-2} d\nu$ , it follows that  $\sup_\omega \|V_\epsilon(\omega)\|_\star = O(N^{-1} T^{-1} \lambda^{-1/4})$ . If we define  $g_{mr} = \text{diag}(g_{1mr}, \dots, g_{Qmr})$ , then

$$\begin{aligned} V_\alpha(\omega) &= n^{-1} \sum_{m,s=1-L}^L \left\{ n^{-1}U^T U + \lambda(2\pi m)^4 \tilde{\Lambda} \right\}^{-1} \left( n^{-1} \sum_{j=1}^N U_j^T V_j g_{ms} V_j^T U_j \right) \\ &\quad \times \left\{ n^{-1}U^T U + \lambda(2\pi s)^4 \tilde{\Lambda} \right\}^{-1} e^{2\pi i(m+s)\omega} + O(T^{-1}). \end{aligned}$$

Since  $\left\| \left\{ n^{-1}U^T U + \lambda(2\pi r)^4 \tilde{\Lambda} \right\}^{-1} \right\|_\star = O(1)$  as  $\lambda \rightarrow 0$  and the summability of the Fourier coefficients of  $\Gamma$  assure that there exists a constant  $C_0$  such that  $\sum_{m,r=1-L}^L \|n^{-1} \sum_{j=1}^N U_j^T V_j g_{mr} V_j^T U_j\|_\star \leq C_0$  whenever  $U_j, V_j$  satisfy (RA6) and (RA7), it follows that  $\sup_\omega \|V_\alpha(\omega)\|_\star = O(N^{-1} + T^{-1})$ .

Consequently,  $\sup_{p,\omega} E \left\{ |\hat{\beta}_p(\omega) - \beta_p(\omega)|^2 \right\} = O(\lambda + N^{-1} T^{-1} \lambda^{-1/4} + T^{-1} + N^{-1})$  and

Theorem 2 follows.

### 3. PROOF OF THEOREM 3

Decomposing the mean squared error

$$\sup_{q,\omega,\nu} E \left\{ \left| \hat{\Gamma}_q(\omega, \nu) - \Gamma_q(\omega, \nu) \right|^2 \right\} = \sup_{q,\omega,\nu} \left| E \left\{ \hat{\Gamma}_q(\omega, \nu) \right\} - \Gamma_q(\omega, \nu) \right|^2 + \sup_{q,\omega,\nu} E \left\{ \left| \hat{\Gamma}_q(\omega, \nu) - E \hat{\Gamma}_q(\omega, \nu) \right|^2 \right\}$$

we will sketch the proof for the convergence of the mean and bias terms separately assuming that

$\lambda \sim N^{-4/5}T^{-4/5}$ . To investigate the bias term, apply the Woodbury Formula (1) so that

$$\begin{aligned} \sup_{q,\omega,\nu} \left| \mathbb{E} \left\{ \hat{\Gamma}_q(\omega, \nu) \right\} - \Gamma_q(\omega, \nu) \right| &\leq \sum_{k,\ell=1,2} \sup_{j,\omega,\nu} \|B_{\alpha_j k \ell}(\omega, \nu)\|_{\star} + \sup_{j,\omega,\nu} \|B_{\epsilon_j}(\omega, \nu)\|_{\star} \\ &+ O(N^{-2/5}T^{-2/5} + N^{-1/2} + T^{-1/2}) \end{aligned}$$

where

$$\begin{aligned} B_{\alpha_j 11}(\omega, \nu) &= \frac{1}{T^2} \sum_{\ell,m,r,s=1-L}^L \Gamma(\omega_{\ell}, \nu_r) e^{2\pi i m(\omega - \omega_{\ell}) + 2\pi i s(\nu - \nu_r)} - \Gamma(\omega, \nu) \\ B_{\alpha_j 12}(\omega, \nu) &= \frac{1}{T^2} \sum_{\ell,m,r,s=1-L}^L \theta(2\pi s)^4 \Gamma(\omega_{\ell}, \nu_r) \left\{ n_j V_j^T V_j + \theta(2\pi s)^4 \tilde{\Theta} \right\}^{-1} \tilde{\Theta} e^{2\pi i m(\omega - \omega_{\ell}) + 2\pi i s(\nu - \nu_r)} \\ B_{\alpha_j 21}(\omega, \nu) &= B_{\alpha_j 12}(\nu, \omega) \\ B_{\alpha_j 22}(\omega, \nu) &= \frac{1}{T^2} \sum_{\ell,m,r,s=1-L}^L \theta^2(2\pi m)^4 (2\pi s)^4 \tilde{\Theta} \left\{ n_j V_j^T V_j + \theta(2\pi m)^4 \tilde{\Theta} \right\}^{-1} \Gamma(\omega_{\ell}, \nu_r) \\ &\quad \times \left[ n_j V_j^T V_j + \theta(2\pi s)^4 \tilde{\Theta} \right]^{-1} \tilde{\Theta} e^{2\pi i m(\omega - \omega_{\ell}) + 2\pi i s(\nu - \nu_r)} \\ B_{\epsilon_j}(\omega, \nu) &= \frac{1}{T^2} \sum_{\ell,r=1-L}^L \sigma_{\ell}^2 \delta_{|\ell||r|} \sum_{m,s=1-L}^L \left\{ V_j^T V_j + \theta n_j (2\pi m)^4 \tilde{\Theta} \right\}^{-1} V_j^T V_j \\ &\quad \times \left\{ V_j^T V_j + \theta n_j (2\pi s)^4 \tilde{\Theta} \right\}^{-1} e^{2\pi i(m+s)\omega} e^{2\pi i m(\omega - \omega_{\ell}) + 2\pi i s(\nu - \nu_r)}. \end{aligned}$$

Using similar algebra to that used in the proof of Theorem 2 it can be found that

$$\begin{aligned} \sup_{j,\omega,\nu} \|B_{\alpha_j 11}(\omega, \nu)\|_{\star} &\leq \sum_{|m|,|s|>L} \|g_{ms}\|_{\star} + O(T^{-1}) = O(T^{-1}) \\ \sup_{j,\omega,\nu} \|B_{\alpha_j 12}(\omega, \nu)\|_{\star} &\leq \sum_{m,s=-\infty}^{\infty} \frac{\theta(2\pi s)^4}{n_- D_3 + \theta(2\pi s)^4} \|g_{ms}\|_{\star} + O(T^{-1}) = O(\theta^{1/2} + T^{-1}) \\ \sup_{j,\omega,\nu} \|B_{\alpha_j 22}(\omega, \nu)\|_{\star} &\leq \sum_{m,s=-\infty}^{\infty} \frac{\theta^2(2\pi s)^4 (2\pi m)^4}{\{n_- D_3 + \theta(2\pi m)^4\} \{n_- D_3 + \theta(2\pi s)^4\}} \|g_{ms}\|_{\star} + O(T^{-1}) = O(\theta + T^{-1}) \\ \sup_{j,\omega,\nu} \|B_{\epsilon_j}(\omega, \nu)\|_{\star} &\leq \frac{\sigma_0^2 D_3}{T} \sum_{m=-\infty}^{\infty} \{D_3 + \theta n_j C(2\pi m)^4\}^{-2} = O(T^{-1} \theta^{-1/4}) \end{aligned}$$

and the supremum squared bias is  $O(\theta + T^{-2} \theta^{-1/2} + N^{-4/5} T^{-4/5} + N^{-1} + T^{-1})$ .

To investigate the variance term, let  $\mathcal{E}_{j\ell mrs} = \left\{ Y_{j\ell}^* Y_{jr}^{*T} - \mathbf{E} Y_{j\ell}^* Y_{jr}^{*T} \right\} e^{-2\pi i(m\omega_\ell + s\omega_r)}$  so that

$$\begin{aligned}
\sup_{q,\omega,\nu} \mathbf{E} \left\{ \left| \hat{\Gamma}_q(\omega, \nu) - \mathbf{E} \Gamma_q(\omega, \nu) \right|^2 \right\} &\leq \sup_{\omega,\nu} \mathbf{E} \left[ \left\| \hat{\Gamma}(\omega, \nu) - \mathbf{E} \left\{ \hat{\Gamma}(\omega, \nu) \right\} \right\|_*^2 \right] \\
&\leq N^{-1} \sup_{j=1,\dots,N} \left[ \left\| V_j^T V_j \right\|_*^2 \left\{ \sum_{m=-\infty}^{\infty} \left\| V_j^T V_j + \theta n_j (2\pi m)^4 \tilde{\Theta} \right\|_*^{-2} \right\}^2 \right. \\
&\quad \left. \times \sum_{\ell,r,m,s=-\infty}^{\infty} \mathbf{E} \left\| \mathcal{E}_{jms} \right\|_*^2 / T^4 \right] + O(N^{-4/5} T^{-4/5} + N^{-1} + T^{-1}) \\
&= N^{-1} D_3^2 \left[ \sum_{m=-\infty}^{\infty} \left\{ D_3 + \theta n_j (2\pi m)^4 C \right\}^{-2} \right]^2 \\
&\quad \times \left[ \tau_8 \sup_{\omega, U_{jk}, V_{jk}} \mathbf{E} \left\{ \log f_{jk}^4(\omega; U_{jk}, V_{jk}) \right\} \right] + O(N^{-4/5} T^{-4/5} + N^{-1} + T^{-1}) \\
&= O \left( N^{-1} \theta^{-1/2} + N^{-4/5} T^{-4/5} + N^{-1} + T^{-1} \right).
\end{aligned}$$

Combining the results from the bias and variance terms,

$$\sup_{q,\omega,\nu} \mathbf{E} \left\{ \left| \hat{\Gamma}_q(\omega, \nu) - \Gamma_q(\omega, \nu) \right|^2 \right\} = O \left\{ \theta + (N^{-1} + T^{-2}) \theta^{-1/2} + N^{-4/5} T^{-4/5} + N^{-1} + T^{-1} \right\}$$

and Theorem 3 follows.

## REFERENCES

- BRILLINGER, D. R. (2002). *Time Series: Data Analysis and Theory*. Philadelphia: SIAM.
- BROCKWELL, P. J. & DAVIS, R. A. (2006). *Time Series: Theory and Methods*. New York: Springer.
- FAY, G., MOULINES, E. & SOULIER, P. (2002). Nonlinear functionals of the periodogram. *Journal of Time Series Analysis* **23**, 523–553.
- GÖTZE, F. & HIPPEL, C. (1983). Asymptotic expansions for sums of weakly dependent random vectors. *Z. Wahrsch. Verw. Gebiete* **64**, 211–239.
- JANAS, D. & VON SACHS, R. (1995). Consistency for non-linear functionals of the periodogram of tapered data. *Journal of Time Series Analysis* **16**, 585–606.
- VON SACHS, R. (1994). Peak-insensitive non-parametric spectrum estimation. *Journal of Time Series Analysis* **15**, 429–452.
- ZYGMUND, A. (2003). *Trigonometric Series*. Cambridge: Cambridge University Press.
